# Supplementary material for: Rapid syntheses of a metal–organic framework material Cu3(BTC)2(H2O)3 under microwave: a quantitative analysis of accelerated syntheses
Source: Royal Society of Chemistry journal article supplement (doi:10.1039/b921558a), 2010-01-01
Supplement: b921558a.pdf [file b921558a.pdf]

*ESI for PCCP*

**Rapid syntheses of a metal–organic framework material  
 $\text{Cu}_3(\text{BTC})_2(\text{H}_2\text{O})_3$  under microwave: A quantitative analysis of  
accelerated syntheses**

*Nazmul Abedin Khan, Enamul Haque, Sung Hwa Jhung\**

[\*] Department of Chemistry  
Kyungpook National University  
Daegu 702-701, Korea  
Fax: (+)82-53-950-6330  
E-mail: [sung@knu.ac.kr](mailto:sung@knu.ac.kr)

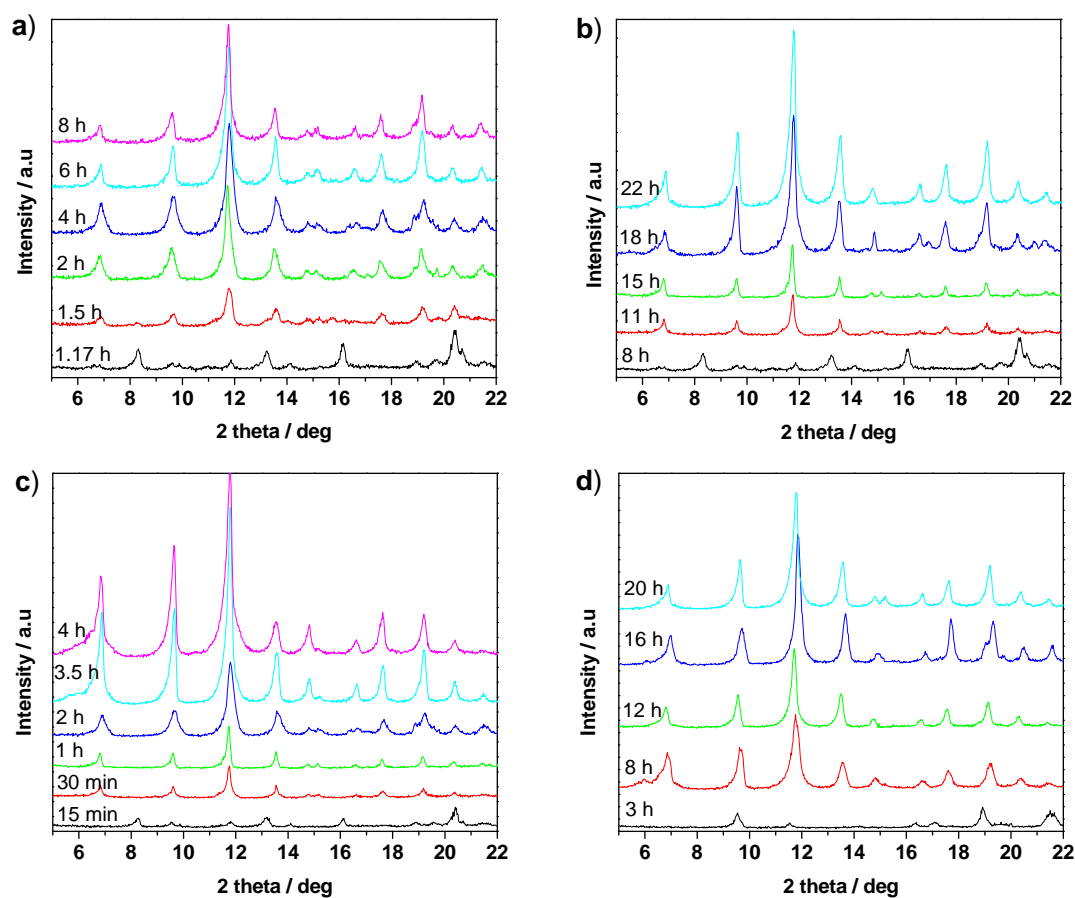

**Fig. S1.** Changes of XRD patterns of Cu-BTC with reaction time, synthesized at (a) 100 °C by MW irradiation; (b) 100 °C by CE heating; (c) 110 °C by MW irradiation and (d) 110 °C by CE heating.

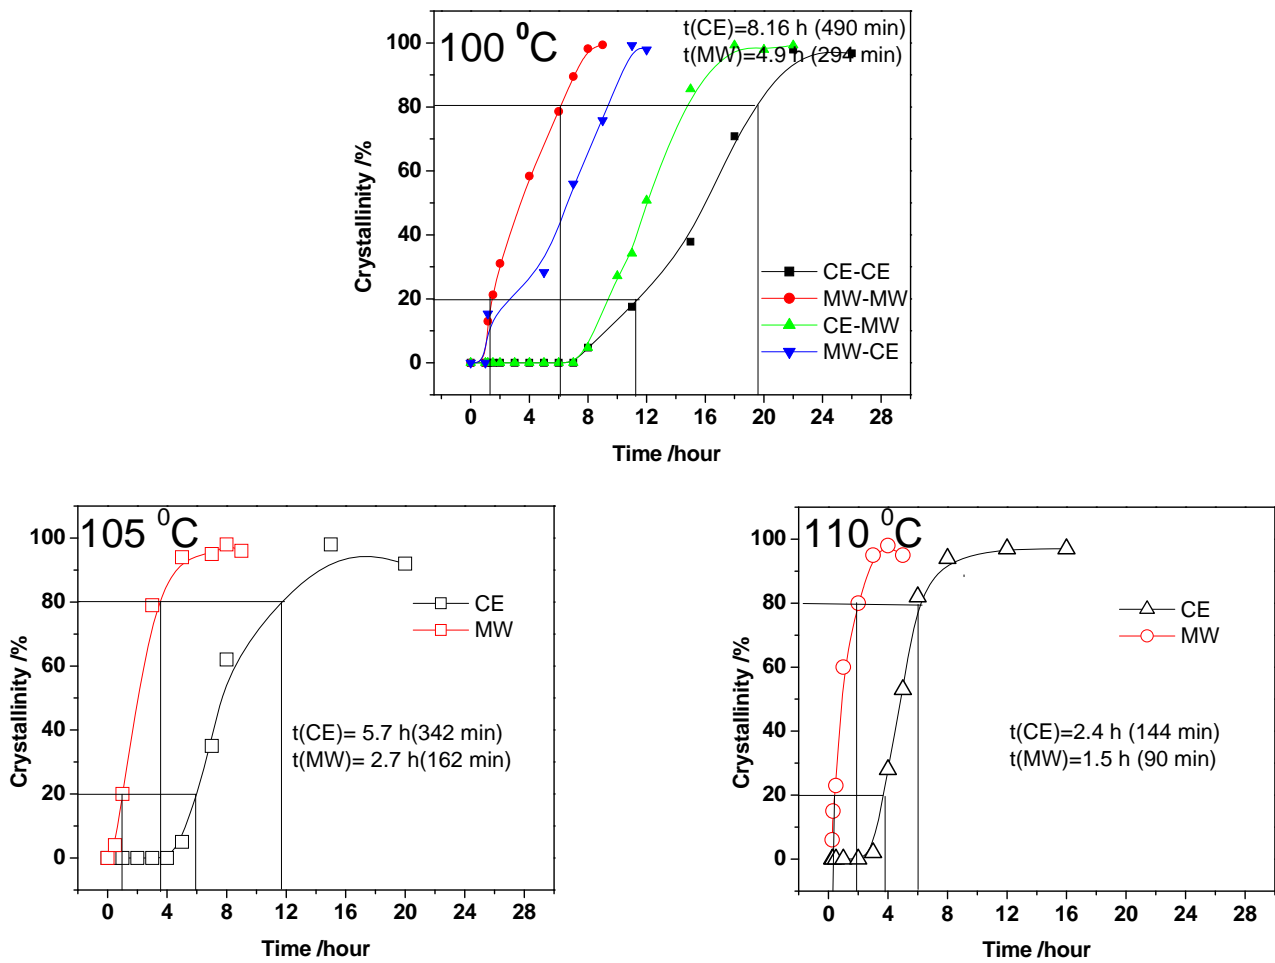

**Fig. S2.** The points of XRD crystallinity (20% and 80%) that were used to calculate the crystal growth rates.

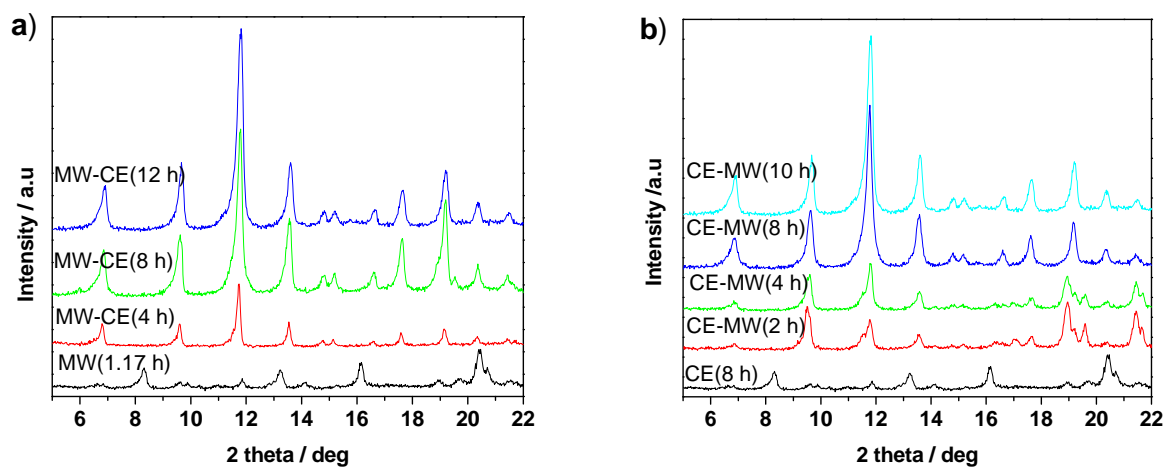

**Fig. S3.** XRD patterns for the syntheses of Cu-BTC in two steps at 100 °C: (a) MW (1.17 h)-CE; (b) CE (8 h)-MW with various crystal growth times.
